# Supplementary material
Source: MDPI journal article supplement (https://www.mdpi.com/1424-8247/14/8/795)
Supplement: s1 [file s1]

## Supplementary Materials

**Figure S1. Heatmap visualization of antimicrobial-resistant profiles for 134 carbapenem-resistant *K. pneumoniae* isolates.** Antibiotic susceptibilities: light pink, susceptible; pink, intermediate; dark pink, resistant. Antibiotic-resistant profiles were determined for aztreonam (ATM; 132/134, 98.5%), ceftazidime (CAZ; 132/134, 98.5%), cefazolin (CFZ; 134/134, 100%), ciprofloxacin (CIP; 129/134, 96.3%), doripenem (DOR; 134/134, 100%), ertapenem (ETP; 133/134, 99.3%), cefepime (FEP; 128/134, 95.6%), ceftazidime (CAZ; 133/134, 99.3%), cefotaxime (FTX; 134/134, 100%), ceftriaxone (FRX; 134/134, 100%), imipenem (IMP; 133/134, 99.3%), levofloxacin (LEV; 126/134, 94.0%), meropenem (MEM; 129/134, 96.3%), trimethoprim/sulfamethoxazole (SXT; 117/134, 87.3%), piperacillin-tazobactam (TZP; 133/134, 99.3%), colistin (COL; 55/134, 41.0%), gentamicin (GEN; 86/134, 64.2%), and amikacin (AMK; 43/134, 32.1%). Differences between isolate groups were categorized according to antibiotic-resistant profiles.

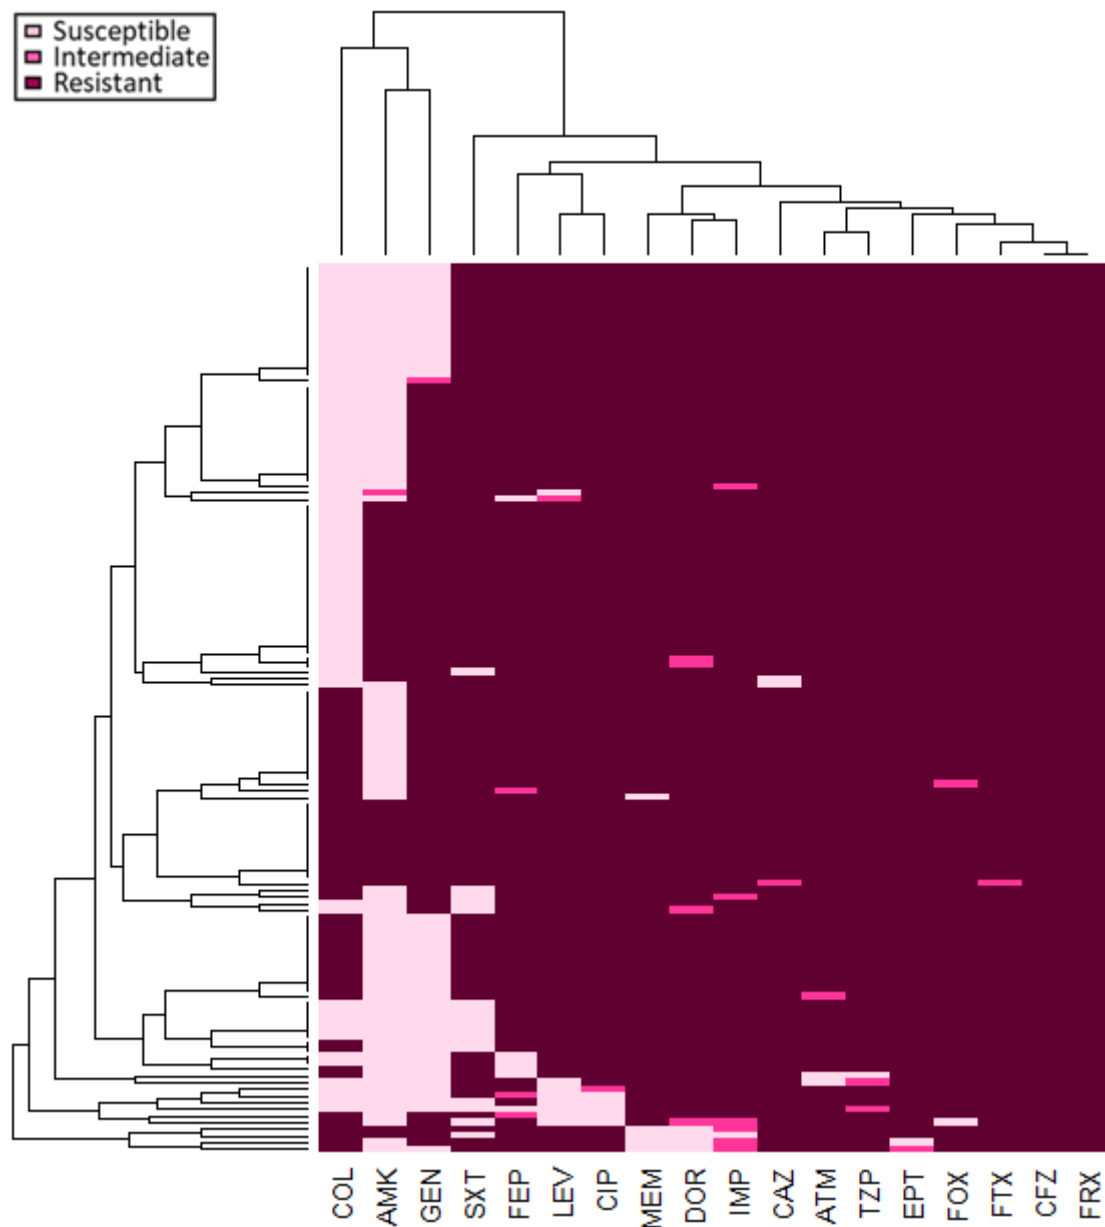

**Figure S2. ESBL and carbapenemase gene distributions in 134 carbapenem-resistant *K. pneumoniae* isolates.** Black and grey colors indicate positive and negative PCR detection results, respectively. Differences between isolate clusters were categorized according to gene carriages or distributions.

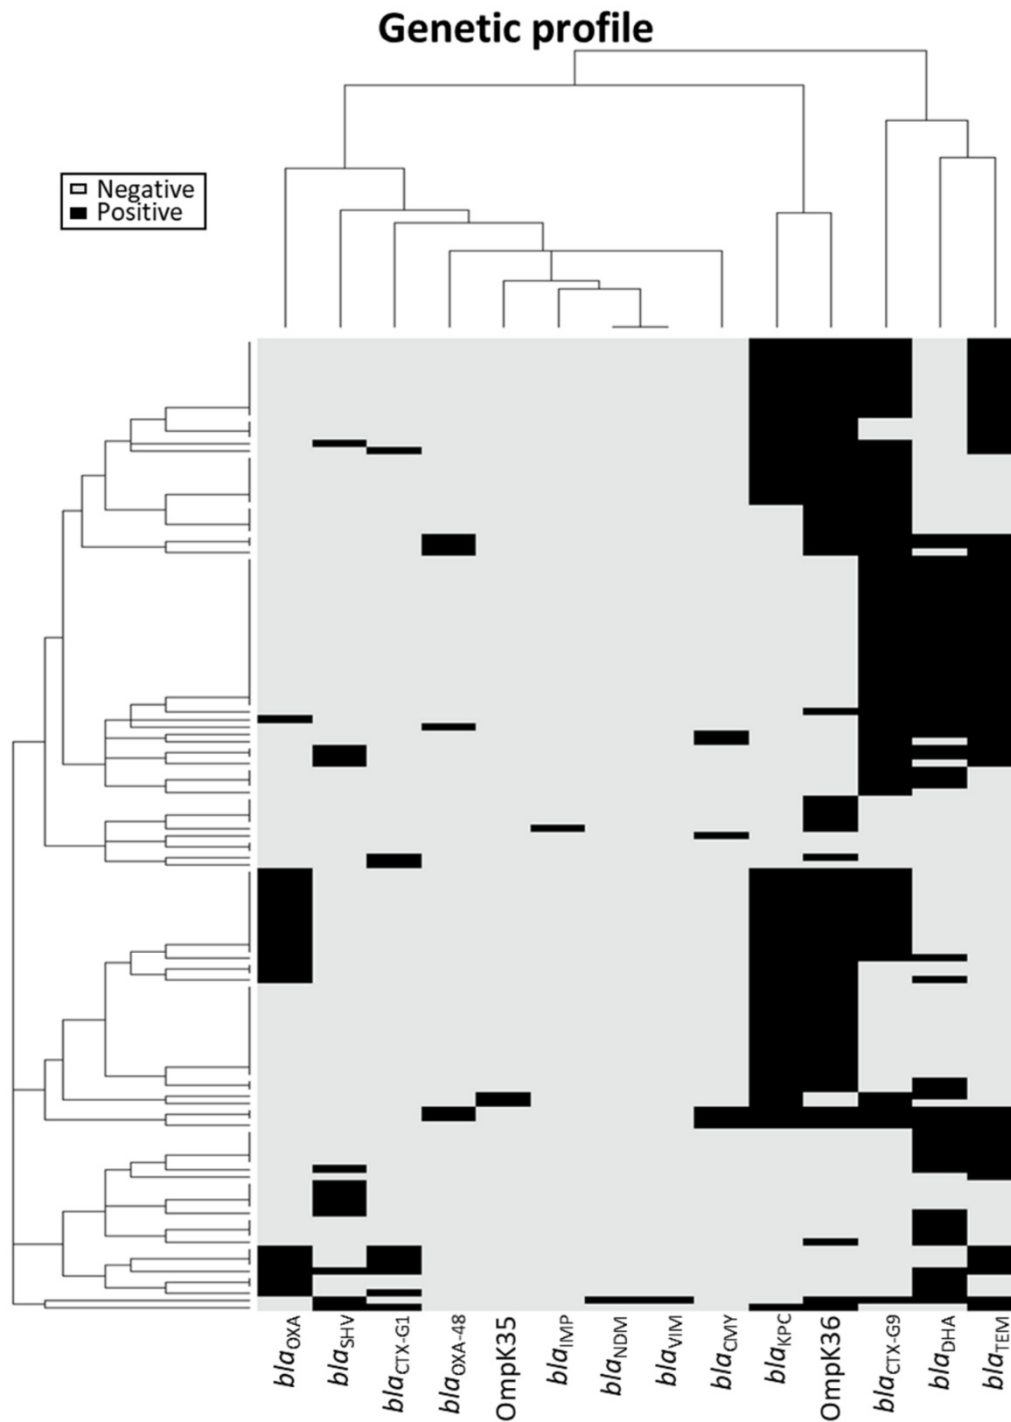

**Figure S3. Phylogenetic tree for 134 carbapenem-resistant isolates.** A pulsotype relationship dendrogram was constructed according to Dice similarity and unweighted pair group method with arithmetic mean (UPGMA), using GelComparII software version 6.5 (Applied Maths, Sint-Martens-Latem, Belgium). Pulsotypes were assigned to the same cluster if they exhibited 70% similarity. Multi-locus sequence types are shown next to isolate codes.

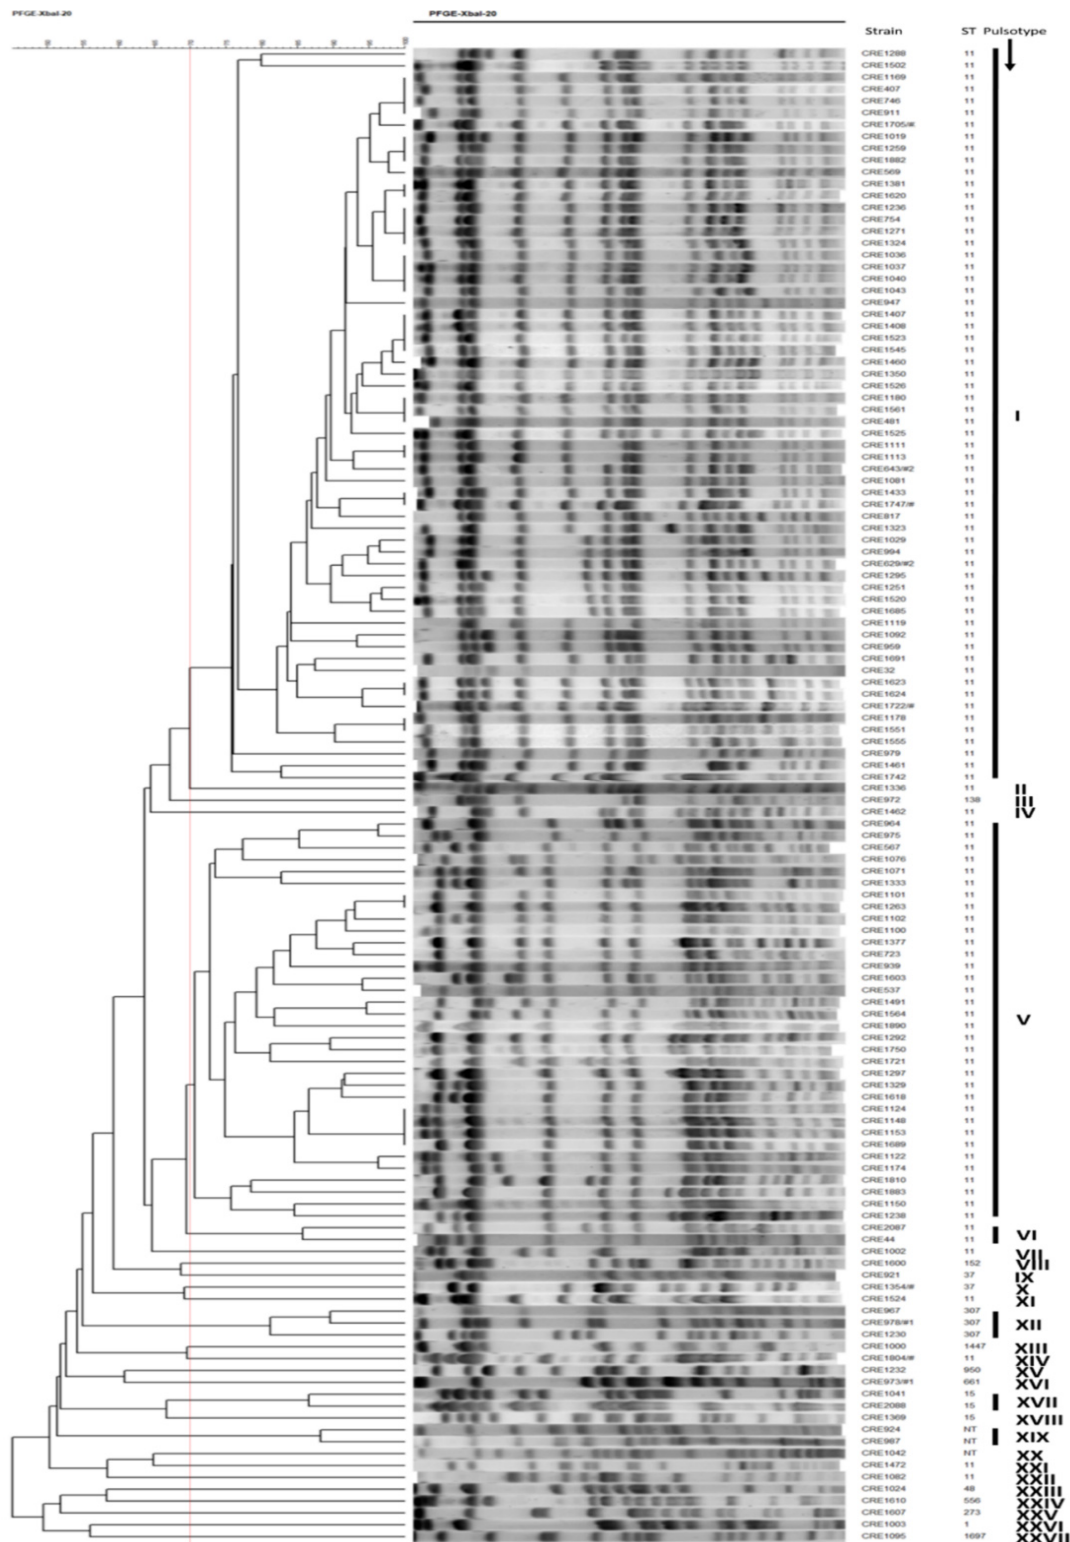

**Figure S4. Time-kill kinetic assay data for AS101 against colistin- and carbapenem-resistant *K. pneumoniae* isolate CRE-723.** Following treatment with 1x MIC (filled squares), 2x MIC (filled triangles), 4x MIC (filled inverted triangles) or untreated control (filled circles) of (a), tigecycline; (b), rifampin; or (c), AS101, colistin-resistant CRKP isolate CRE-723, viability was measured at 2, 4, 8 and 24 h. (d), Short-term assays were performed to create an AS101 antibacterial activity profile at 2 h. Data are expressed as mean $\pm$ SD for triplicate experiments. Dashed-dotted lines indicate a 99.9% reduction of beginning inoculum; dotted lines indicate detection limits. CFU, colony-forming unit.

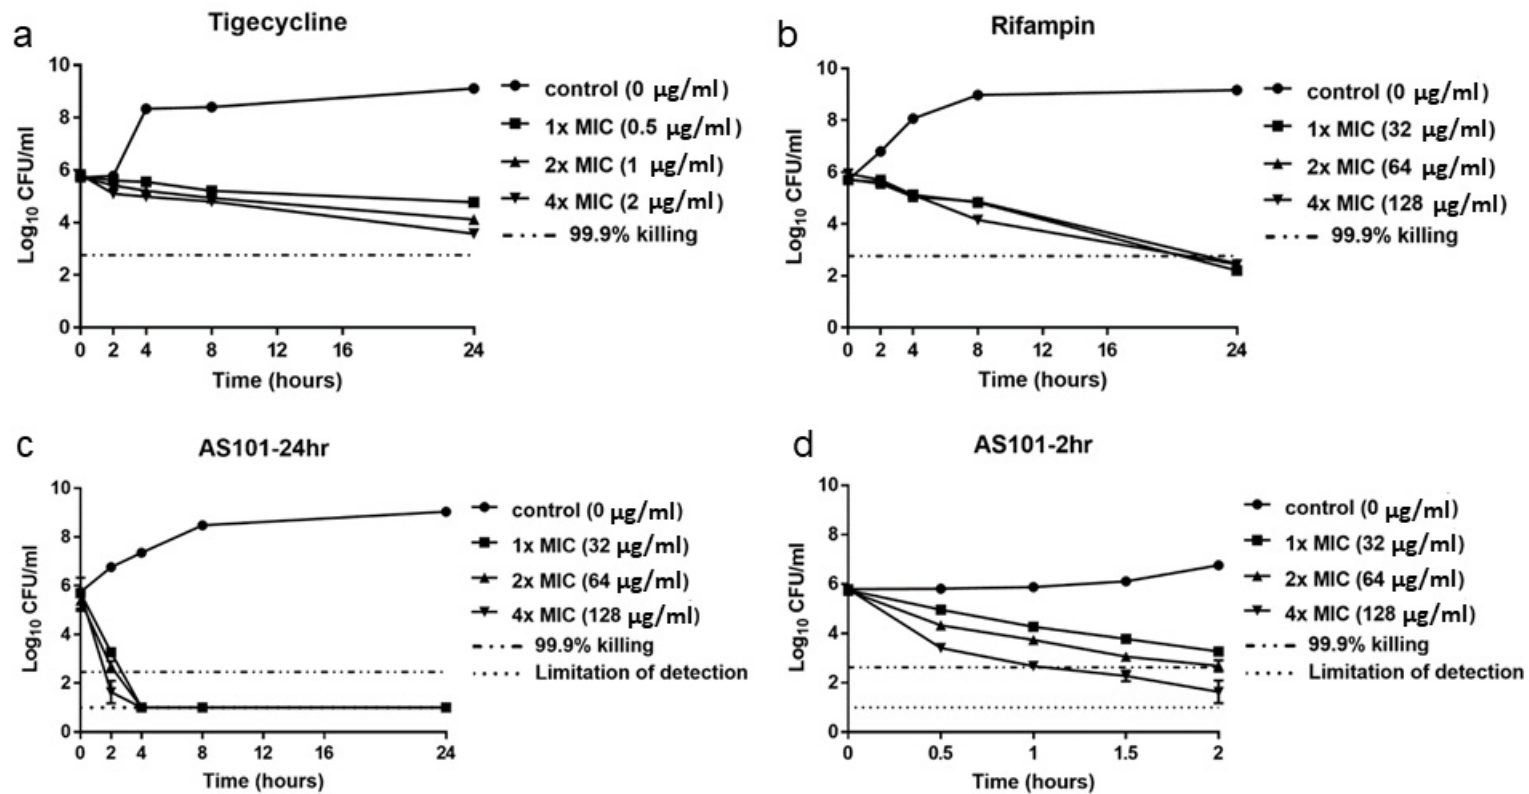

**Figure S5. Electron micrographs of colistin- and carbapenem-resistant *K. pneumoniae* isolate CRE-723 treated with AS101.** Scanning electron microscopy (SEM) and transmission electron microscopy (TEM) micrographs were captured at (a-b), 5,000x magnification and (c-d), 100,000x magnification, respectively. (a) and (c), Untreated (control) bacterial morphologies remained intact and smooth. (b) and (d), red arrows: Leaking and wrinkly surfaces and empty cell envelopes were observed following exposure to 1x MIC (32 µg/ml) AS101.

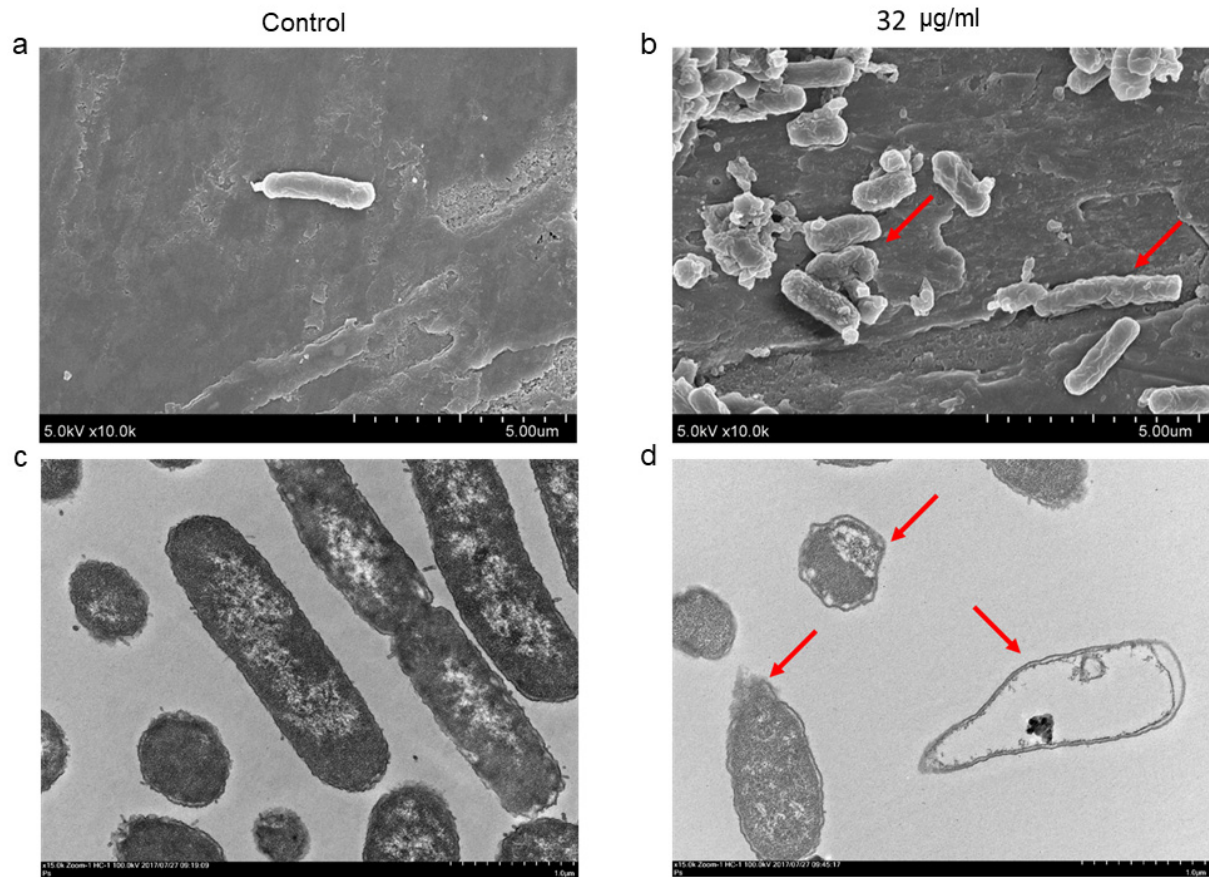

**Figure S6. ROS detection in AS101-treated colistin- and carbapenem-resistant *K. pneumoniae* isolate CRE-723.** ROS levels were determined following exposure to 1x MIC (32  $\mu\text{g/ml}$ ), 2x MIC (64  $\mu\text{g/ml}$ ), or 4x MIC (128  $\mu\text{g/ml}$ ) AS101, or 5% ethanol as a control (0  $\mu\text{g/ml}$ ). Data are normalized to viable bacterial counts and expressed as mean $\pm$ SD. \*,  $p<0.05$ ; \*\*,  $p<0.01$ .

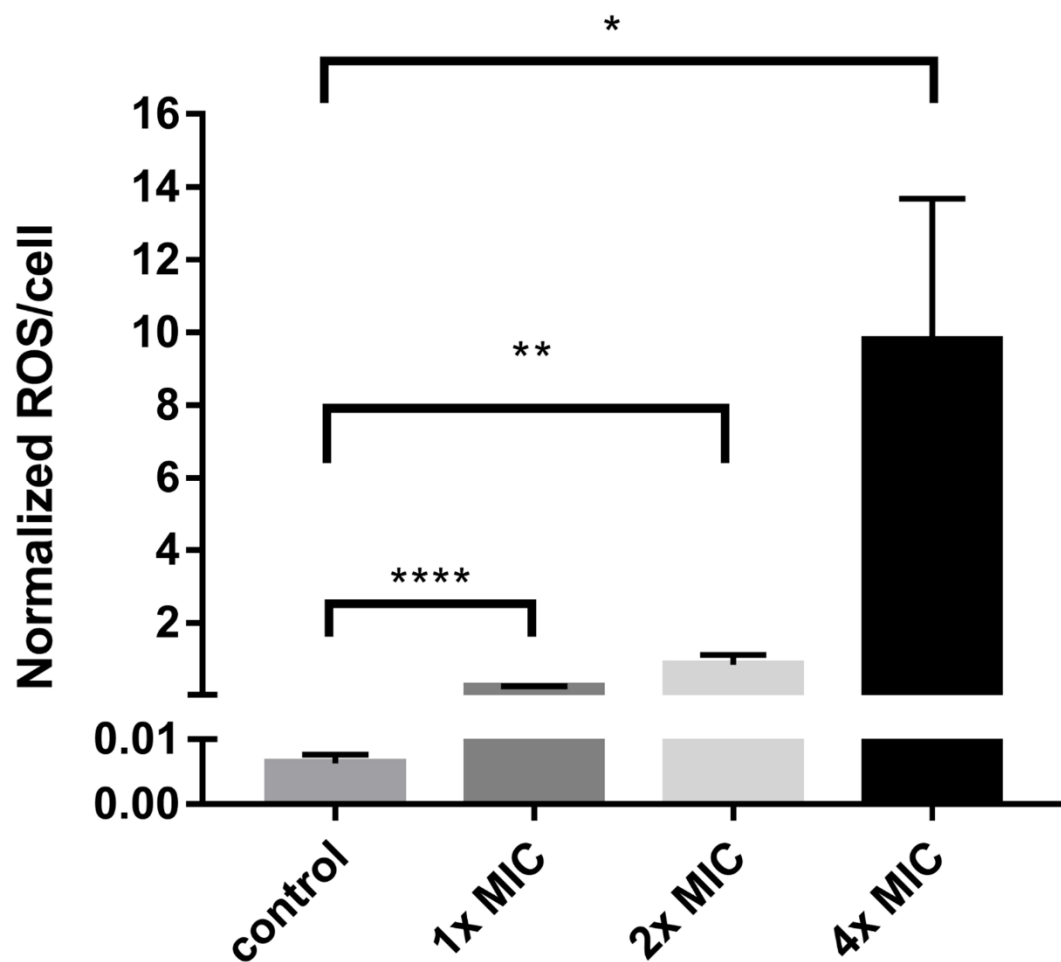

**Table S1. MIC values of *K. pneumoniae* ATCC BAA-1705 and CRE-723 to agents tested in this study.**

| <i>K.<br/>pneumoniae</i><br>strain | MICs to antimicrobials (µg/ml) |             |          |          |          |                         |
|------------------------------------|--------------------------------|-------------|----------|----------|----------|-------------------------|
|                                    | AS101                          | Tigecycline | Rifampin | Colistin | Imipenem | Imipenem-<br>Relebactam |
| ATCC BAA-1705                      | 32                             | 0.5         | 32       | 0.5      | 4        | 0.125/4                 |
| CRE-723                            | 32                             | 0.5         | 32       | >1024    | 8        | 0.25/4                  |

**Table S2. AS101 MIC values for pharmacological manipulations against *K. pneumoniae* ATCC BAA-1705 and CRE-723.**

| Strain                 | AS101 MIC (µg/ml)                     |                                         |
|------------------------|---------------------------------------|-----------------------------------------|
|                        | <i>K. pneumoniae</i><br>ATCC BAA-1705 | <i>K. pneumoniae</i><br>CRE-723 isolate |
| Control                | 32                                    | 32                                      |
| Mannitol 320 mM        | 128                                   | 128                                     |
| EDTA 2 mM              | 4                                     | 2                                       |
| Ca <sup>2+</sup> 10 mM | 32                                    | 32                                      |
| Mg <sup>2+</sup> 10 mM | 32                                    | 32                                      |



**Table S3. Treatment effect of AS101 in *C. elegans* model**

| Strain                                | Group   | Survival (days) |        | <i>p</i> value | Risk ratio | 95% CI |       |
|---------------------------------------|---------|-----------------|--------|----------------|------------|--------|-------|
|                                       |         | Mean $\pm$ SD   | Median |                |            | Lower  | Upper |
| <i>K. pneumoniae</i><br>ATCC BAA-1705 | 1x MIC  | 4.68 $\pm$ 0.44 | 3.5    | < 0.0001       | 0.32       | 0.19   | 0.54  |
|                                       | 2x MIC  | 4.73 $\pm$ 0.35 | 5      |                | 0.33       | 0.20   | 0.54  |
|                                       | control | 2.45 $\pm$ 0.16 | 3      |                | 1.00       | -      | -     |
| <i>K. pneumoniae</i><br>CRE-723       | 1x MIC  | 4.63 $\pm$ 0.44 | 4.5    | < 0.0001       | 0.35       | 0.21   | 0.58  |
|                                       | 2x MIC  | 4.35 $\pm$ 0.41 | 3.5    |                | 0.37       | 0.23   | 0.61  |
|                                       | control | 2.3 $\pm$ 0.15  | 2      |                | 1.00       | -      | -     |
